# Supplementary material
Source: PubMed Central journal article supplement (PMC6778032)

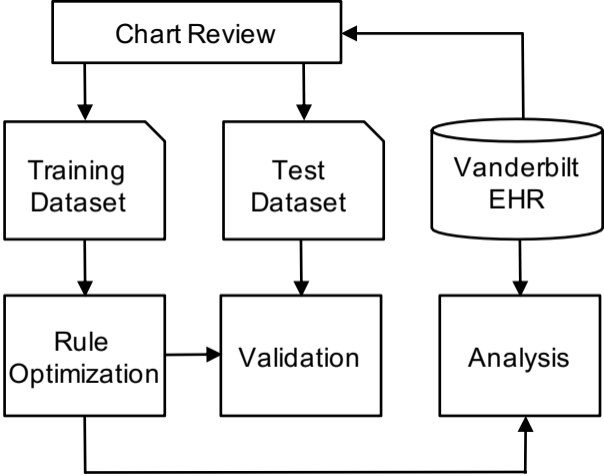

Supplement: NIHMS1534634-supplement-1.pdf [file NIHMS1534634-supplement-1.pdf]

Intersection Size

1200  
900  
600  
300  
0

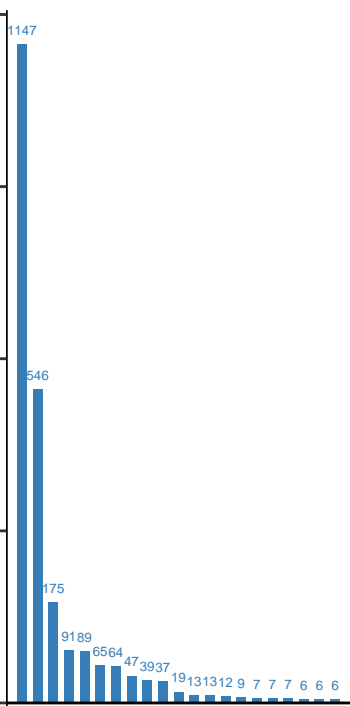

- Struvite
- Brushite
- Hydroxyapatite
- Uric Acid
- CaOxD
- CaOxM

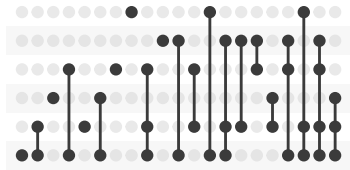

2000 1500 1000 500 0  
Patients

Supplement: NIHMS1534634-supplement-2.pdf [file NIHMS1534634-supplement-2.pdf]
